# Supplementary material for: Silicon-enriched meat positively improves plasma lipidaemia and lipoproteinaemia, LDLr, and insulin capability and the signalling pathway induced by an atherogenic diet in late-stage type 2 diabetes mellitus rats
Source: Royal Society of Chemistry journal article supplement (doi:10.1039/d3fo04103d), 2024-01-01
Supplement: d3fo04103d1.xlsx [file d3fo04103d1.xlsx]

## Sheet: Lipoproteins raw results
N_Rata	Rata	grupo	grupocodigo	Initial_Weight	Final_Weight	BodyGain	DietaryDigestibility	Faecal_Fat	FeedIntake	FaecalExcretion	Faecal_Moisture	TGmg_dl	Cholmg_dl	Phosphmg_dl	TotLipmg_dl	Chol_Phos	AInonHDL_HDL	VLDLchol	VLDLphos	VLDLtg	VLDLlipid	VLDLprot	VLDLm	IDLchol	IDLphos	IDLtg	IDLlipid	IDLprot	IDLm	LDLchol	LDLphos	LDLtg	LDLlipid	LDLprot	LDLm	HDLchol	HDLphos	HDLtg	HDLlipid	HDLprot	HDLm	pcolVLDL	pfosVLDL	ptrigVLDL	pprotVLDL	pcolIDL	pfosIDL	ptrigIDL	pprotIDL
1	1	Normo Control	1	283	429	146	0.909719	77.8599	18.2036	1.2	15.2419	117.158	80.8797	87.2571	285.295	0.926912	0.311999	15.7189	24.5896	90.681	130.989	5.75934	136.749	0.47193	4.43881	3.275	8.18574	0.12184	8.30758	1.1593	1.32777	4.73521	7.22228	0.561507	7.78379	61.6462	83.0352	12.25	156.932	63.4554	220.387	12	18.77	69.23	4.21161	5.77	54.23	40.01	1.47
2	2	Normo Control	1	270	424	154	0.915362	77.5028	18.2036	1.175	14.6341	155.202	89.256	88.3068	332.765	1.01075	0.589498	14.5508	22.8193	102.174	139.544	6.68142	146.226	0.644931	5.10667	6.98682	12.7384	0.499155	13.2376	1.15595	1.01554	1.49922	3.67071	0.448869	4.11958	56.1535	80.2152	12.413	148.782	68.6253	217.407	10.43	16.35	73.22	4.56924	5.06	40.09	54.85	3.77
3	3	Normo Control	1	287.5	439	151.5	0.931634	91.6475	19.4243	1.04167	15.5642	154.212	75.999	85.0527	315.263	0.893552	0.520574	14.5508	27.576	106.061	148.188	4.76847	152.957	0.720468	3.4511	7.47639	11.648	0.785904	12.4339	1.15595	1.15213	1.12828	3.43636	0.0956101	3.53197	49.9805	56.2851	12.763	119.028	55.494	174.522	9.82	18.61	71.57	3.11752	6.19	29.63	64.19	6.32
5	1b	Normo Control	1	233	354	121	0.9103	74.5053	16.4717	1.2375	12.1249	141.754	97.2737	119.693	358.721	0.812692	0.732281	15.8116	22.0153	94.148	131.975	4.90715	136.882	0.543158	3.37243	4.04906	7.96465	0.515478	8.48013	1.1286	1.17235	1.89146	4.1924	0.440069	4.63247	56.1535	86.2851	11.31	153.748	67.4883	221.237	11.98	16.68	71.34	3.58495	6.82	42.34	50.84	6.08
6	2b	Normo Control	1	231	359	128	0.918838	74.1322	16.4717	1.05	13.95	105.692	62.4682	87.8607	256.021	0.710992	-0.0253477	15.6068	19.704	96.228	131.538	4.81846	136.357	0.844167	4.09646	5.1399	10.0805	0.5734	10.6539	1.09816	0.963947	1.68328	3.74539	0.519194	4.26458	64.0928	66.6039	14.621	145.317	60.3319	205.649	11.86	14.98	73.16	3.53371	8.37	40.64	50.99	5.38
7	3b	Normo Control	1	236	365	129	0.916927	89.2966	17.2666	1.14083	14.3546	115.849	70.4575	92.5056	278.812	0.761657	0.430809	11.066	23.3408	97.858	132.265	4.04105	136.306	0.644931	4.19123	5.38543	10.2216		10.2216	1.37421	1.15213	4.18833	6.71467	0.404095	7.11877	49.2432	76.0651	12.597	137.906	53.7266	191.632	8.37	17.65	73.99	2.96469	6.31	41	52.69	0
8	4b	Normo Control	1	236	397.5	161.5		77.9478	17.2666		14.6125	160.794	79.389	148.56	388.743	0.534389	0.422612	14.5508	23.3408	97.858	135.75	4.50914	140.259	0.644931	4.01853	14.9938	19.6572	0.939335	20.5965	1.01947	1.28104	2.46729	4.76781	0.31948	5.08729	55.8051	83.966	13.386	153.157	56.9583	210.115	10.72	17.19	72.09	3.21486	3.28	20.44	76.28	4.56
25	13	Hiper Control	4	263	340	77	0.874676	156.156	16.3817	1.5	14.4311	46.2746	91.5796	95.1037	232.958	0.962945	0.893345	24.368	22.5489	24.58	71.497	5.37051	76.867	17.9032	16.9913	6.19956	41.0942	8.9321	50.0263	10.8463	8.41013	3.79924	23.0557	2.776	25.8317	48.3692	50.9865	11.486	110.842	53.4564	164.298	34.08	31.54	34.38	6.98675	43.57	41.35	15.09	17.85
26	14	Hiper Control	4	269	385	116	0.870567	160.643	16.3817	1.68	11.245	74.7509	107.114	93.6603	275.526	1.14365	1.37504	23.6125	20.6694	50.02	94.302	5.20207	99.504	16.2478	17.1657	4.75938	38.1728	7.71174	45.8846	11.1735	7.67862	3.79924	22.6514	4.51323	27.1646	45.1	48.8278	11.551	105.479	46.5202	151.999	25.04	21.92	53.04	5.228	42.56	44.97	12.47	16.81
27	15	Hiper Control	4	250	366	116	0.867146	172.542	15.9325	1.65	14.4218	63.9299	112.687	86.9422	263.559	1.29611	1.56795	20.1838	21.6174	41.892	83.693	6.45676	90.15	18.6369	16.9913	7.28542	42.9137	10.5144	53.4281	11.1735	8.31499	3.44094	22.9294	5.47257	28.402	43.8821	50.4684	10.943	105.294	53.8886	159.183	24.12	25.83	50.05	7.16224	43.43	39.59	16.98	19.68
29	13b	Hiper Control	4	240	359	119	0.8821	165.858	17.418	1.63	13.1338	73.9373	112.015	91.8758	277.829	1.2192	1.44184	25.3663	22.7937	46.273	94.433	5.42158	99.855	17.337	16.4684	5.8326	39.638	7.91558	47.5536	9.51579	8.46809	3.12031	21.1042	5.00286	26.1071	45.8734	49.1149	11.551	106.539	50.8528	157.392	26.86	24.14	49	5.42945	43.74	41.55	14.71	16.65
30	14b	Hiper Control	4	252	403	151	0.876046	176.581	16.2489	1.57	16.7886	88.3382	105.784	92.5844	286.706	1.14256	2.20608	25.2462	23.0984	42.897	91.242	3.9147	95.156	17.4073	16.6572	6.92083	40.9853	8.36087	49.3461	8.32737	6.86635	2.52703	17.7207	4.24514	21.9659	32.9947	48.3031	10.22	91.5175	36.9564	128.474	27.67	25.32	47.01	4.11398	42.47	40.64	16.89	16.94
31	15b	Hiper Control	4	225	336	111	0.889494	173.461	16.5297	1.59	14.0368	87.837	108.994	100.378	297.21	1.08583	2.54362	29.7121	28.9571	60.792	119.461	4.16047	123.622	18.2495	15.7128	6.19956	40.1619	11.0195	51.1814	13.3434	8.41013	5.68312	27.4366	5.407	32.8436	30.7579	37.1707	12.21	80.1385	48.76	128.899	24.87	24.24	50.89	3.36547	45.44	39.12	15.44	21.53
32	16b	Hiper Control	4	245	416	171		170.835	17.1551	1.55	14.2004	108.33	119.087	110.613	338.03	1.07661	1.75577	29.0752	25.115	89.113	143.303	5.53797	148.841	19.5409	19.127	6.19956	44.8675	8.07053	52.938	13.8346	9.51539	4.22479	27.5748	4.1758	31.7506	43.2137	53.25	12.896	109.36	50.8856	160.245	20.29	17.53	62.18	3.72073	43.55	42.63	13.82	15.25
41	21	Hiper + Silicio	6	265	334	69		249.492	16.6688		17.7621	34.0704	76.6342	78.8856	189.59	0.971459	0.793526	10.4081	11.339	10.562	32.309	4.87873	37.188	23.0407	7.5042	2.51979	33.0647	8.90429	41.969	10.6416	8.04171	3.36802	22.0514	4.90117	26.9525	42.7282	46.093	14.471	103.293	50.2662	153.559	32.21	35.09	32.69	13.1191	69.68	22.7	7.62	21.22
42	22	Hiper + Silicio	6	228	360	132	0.849288	243.603	16.6688	1.98	16.6252	31.4669	90.641	75.1854	197.293	1.20557	1.12808	13.5373	10.9693	9.343	33.849	4.27859	38.128	30.7331	14.17	4.28641	49.1895	10.8436	60.0331	9.00762	8.8768	2.2925	20.1769	3.86435	24.0413	42.5929	39.7216	13.241	95.5556	42.985	138.541	39.99	32.41	27.6	11.2216	62.48	28.81	8.71	18.06
43	23	Hiper + Silicio	6	258	426	168	0.852796	245.47	16.7132	2.07	16.4155	60.8659	86.6551	113.133	260.653	0.765961	0.86603	15.1206	13.1423	24.629	52.892	5.49449	58.387	24.4483	12.8365	6.81667	44.1015	11.245	55.3465	8.47205	7.30487	3.06299	18.8399	4.04935	22.8892	46.4382	40.775	11.126	98.339	59.8507	158.19	28.59	24.85	46.57	9.41046	55.44	29.11	15.46	20.32
45	21b	Hiper + Silicio	6	241	393	152	0.856252	280.357	18.1664	2.28	16.3341	49.6279	83.3703	98.8039	231.802	0.843795	1.0833	13.675	11.2877	12.921	37.883	6.27399	44.157	17.9914	14.1681	3.8287	35.9881	6.12243	42.1105	7.85801	8.8768	2.51125	19.2461	2.20519	21.4513	40.0185	44.6506	14.104	98.7728	60.1273	158.9	36.1	29.8	34.11	14.2084	49.99	39.37	10.64	14.54
46	22b	Hiper + Silicio	6	224	335	111	0.868934	272.32	16.9973	2.1	16.9194	61.3947	87.0118	104.892	253.299	0.829535	1.26079	18.0745	13.2539	7.149	38.477	5.28162	43.759	24.7066	14.4779	3.71771	42.9022	6.56259	49.4648	9.00762	11.1119	3.06299	23.1825	4.54815	27.7306	38.4874	49.2904	15.816	103.594	51.5015	155.096	46.97	34.45	18.58	12.0698	57.59	33.75	8.67	13.27
47	23b	Hiper + Silicio	6	258	413	155	0.875942	251.266	17.1387	1.81	16.4155	65.7577	94.4927	86.9947	247.245	1.08619	1.08628	19.9081	18.8618	12.921	51.691	5.10805	56.799	17.337	13.4089	4.23385	34.9798	9.05109	44.0309	9.8775	9.42329	3.58677	22.8876	4.09853	26.9861	45.2923	37.1707	11.788	94.2508	58.7254	152.976	38.51	36.49	25	8.9932	49.56	38.33	12.1	20.56
48	24b	Hiper + Silicio	6	245	389	144		242.146	17.6696	2.05	14.4367	67.6087	87.7806	85.4201	240.809	1.02763	1.06092	15.1206	13.142	12.921	41.184	4.44087	45.625	23.0278	14.6232	4.23385	41.8848	9.60106	51.4859	7.0393	8.50224	3.55639	19.0979	3.3837	22.4816	42.5929	34.235	18.18	95.008	53.9093	148.917	36.72	31.91	31.37	9.73341	54.98	34.91	10.11	18.65
[truncated: 27 more columns]
